# Supplementary material for: Physicochemical and Adsorption Characteristics of Divinylbenzene-co-Triethoxyvinylsilane Microspheres as Materials for the Removal of Organic Compounds
Source: MDPI journal article supplement (doi:10.3390/molecules26082396), 2021-04-20
Supplement: s1 [file s1]

Supplementary material for the paper:

# Physicochemical and Adsorption Characteristics of Divinylbenzene-*co*-Triethoxyvinylsilane Microspheres as Materials for the Removal of Organic Compounds

Alicja Bosacka\*, Małgorzata Zienkiewicz-Strzalka, Małgorzata Wasilewska, Anna Derylo-Marczewska\* and Beata Podkościelna

Institute of Chemical Sciences, Faculty of Chemistry, Maria Curie-Skłodowska University, Maria Curie-Skłodowska Sq. 3, 20-031 Lublin, Poland;

malgorzata.zienkiewicz@poczta.umcs.lublin.pl (M.Z.-S.); malgorzata.wasilewska@poczta.umcs.lublin.pl (M.W.);

beatapod@poczta.umcs.lublin.pl (B.P.);

\* Correspondence: alicja.bosacka@poczta.umcs.lublin.pl (A.B.); annad@hektor.umcs.lublin.pl (A.D.-M.); Tel.: +48-81-53-777-66 (A.D.-M.);

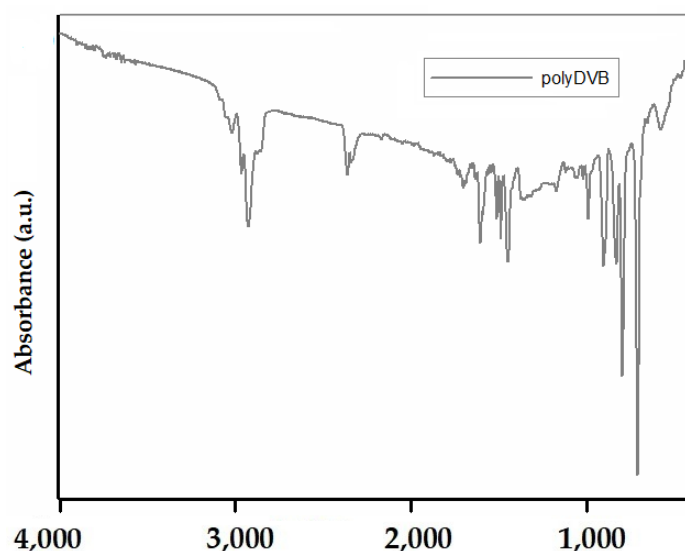

**Figure S1.** FTIR/ATR spectra of DVB.

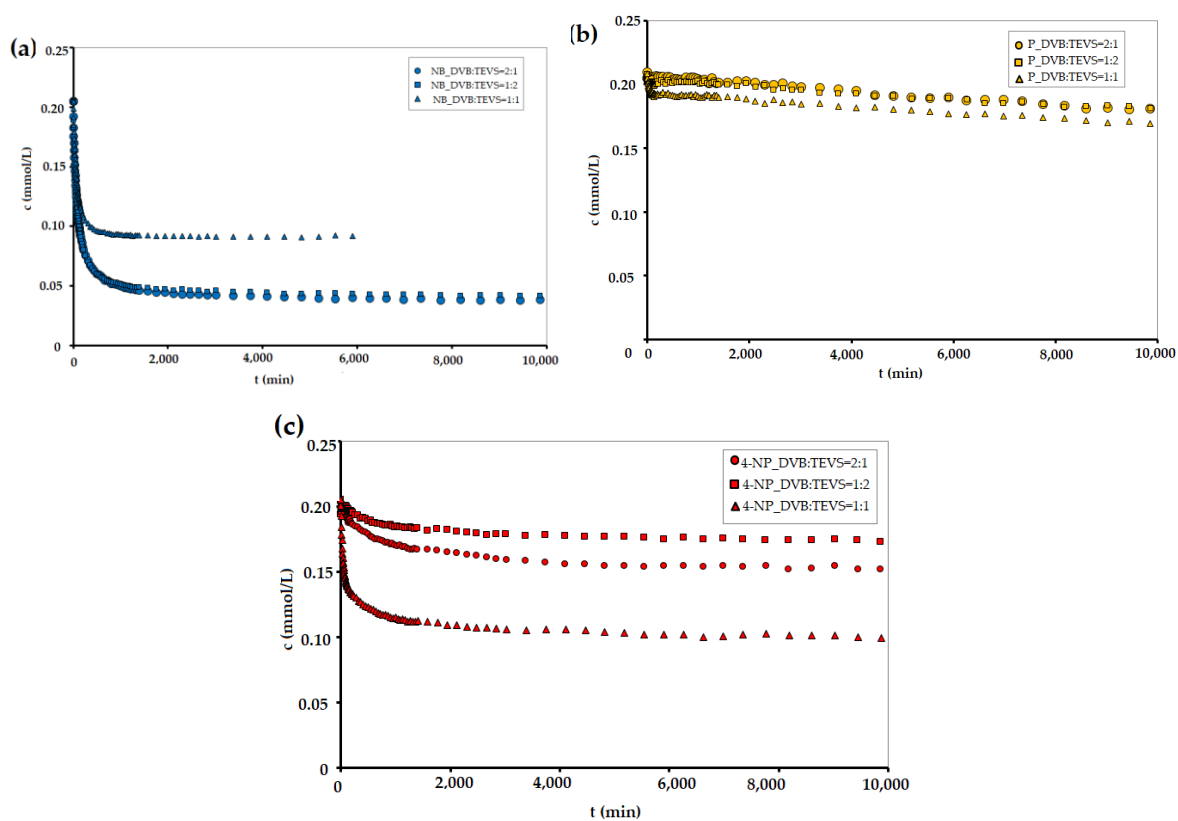

**Figure S2.** Adsorption kinetics for NB (a), P (b) and 4-NP (c) on DVB:TEVS=2:1, DVB:TEVS=1:2 and DVB:TEVS=1:1 presented as changes in concentration over time.

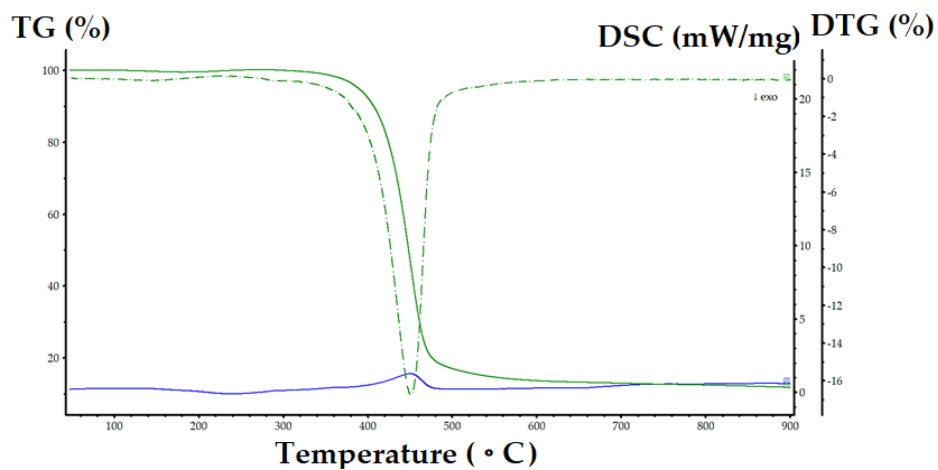

**Figure S3.** TG/DTG/DSC curves of DVB.

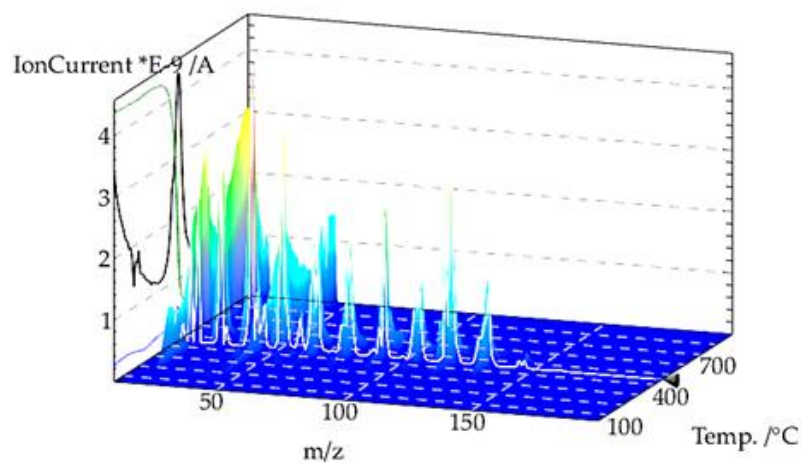

**Figure S4.** 3D MS profile of thermal decomposition of DVB.

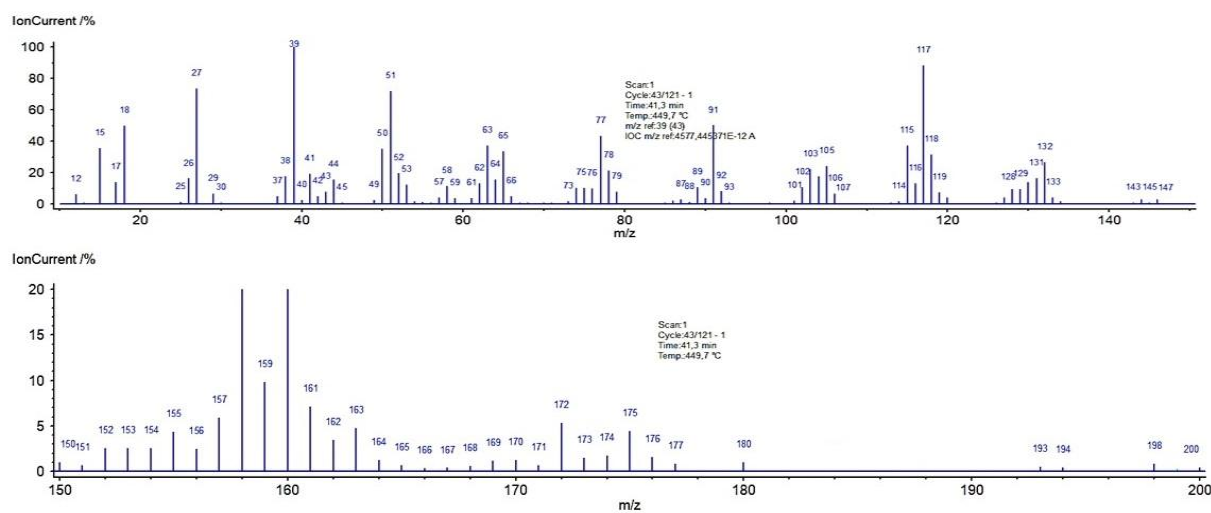

**Figure S5.** MS spectra of thermal degradation of DVB at 450 °C.

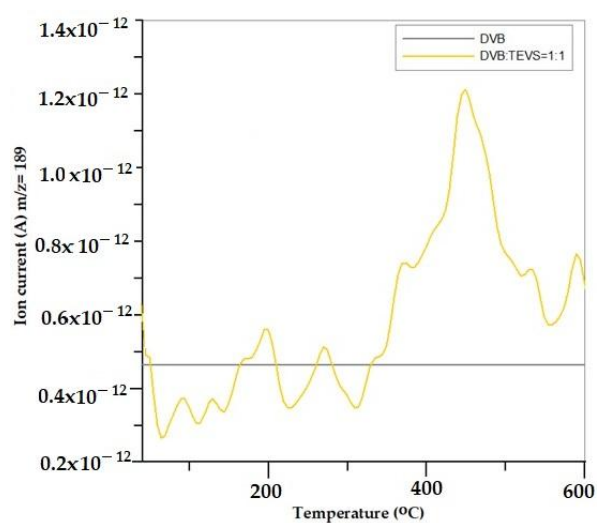

**Figure S6.** MS profiles of gaseous products of thermal degradation of DVB:TEVS=1:1 and DVB (m/z=189).
